# Supplementary material for: Aspect ratio-controlled preparation of α-CaSO4·0.5H2O from phosphogypsum in potassium tartrate aqueous solution
Source: Royal Society of Chemistry journal article supplement (doi:10.1039/c9ra03569a), 2019-01-01
Supplement: c9ra03569a1.pdf [file c9ra03569a1.pdf]

## Supplementary Information for

Aspect ratio-controlled preparation of  $\alpha$ -CaSO<sub>4</sub>·0.5H<sub>2</sub>O  
from phosphogypsum in potassium tartrate aqueous solution

*Xiangbin Sun<sup>a</sup>, Genlei Zhang<sup>a, b, \*</sup> and Peng Cui<sup>a, \*</sup>*

*<sup>a</sup>School of Chemistry and Chemical Engineering, Anhui Province Key Laboratory of  
Controllable Chemistry Reaction and Material Chemical Engineering, Hefei  
University of Technology, Tunxi Road 193, Hefei 230009, PR China*

*<sup>b</sup>School of Materials Science and Engineering, Hefei University of Technology, Tunxi  
Road 193, Hefei 230009, PR China*

### **Corresponding Author**

*E-mail: [genleizhang@hfut.edu.cn](mailto:genleizhang@hfut.edu.cn).*

Number of pages: 9

Number of figures: 7

Number of tables: 1

**Note:** The figures, tables and text in this Supplementary Information document are presented in the order in which they are referenced in the main paper.

## Supplementary Tables

**Table S1** Chemical Composition of the I-PG (wt%)

| CaO   | SO <sub>3</sub> | H <sub>2</sub> O | Na <sub>2</sub> O | K <sub>2</sub> O | MgO  | Al <sub>2</sub> O <sub>3</sub> | SiO <sub>2</sub> | P <sub>2</sub> O <sub>5</sub> | F    | others |
|-------|-----------------|------------------|-------------------|------------------|------|--------------------------------|------------------|-------------------------------|------|--------|
| 30.83 | 42.12           | 18.65            | 0.21              | 0.38             | 0.55 | 0.59                           | 3.91             | 1.64                          | 1.01 | 0.31   |

## Supplementary Figures

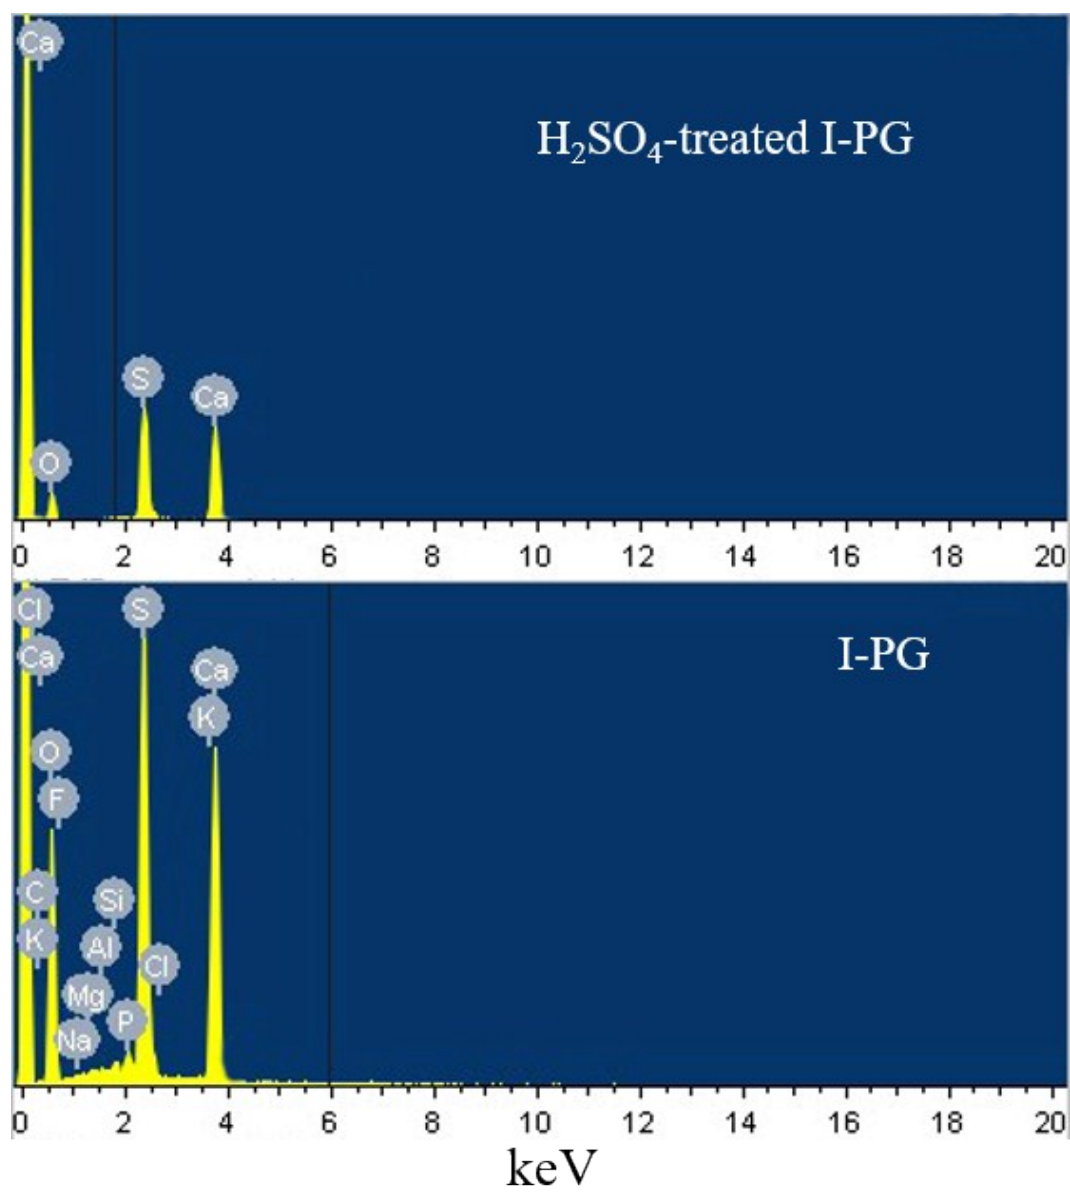

**Fig.S1** EDS of I-PG and H<sub>2</sub>SO<sub>4</sub>-treated I-PG

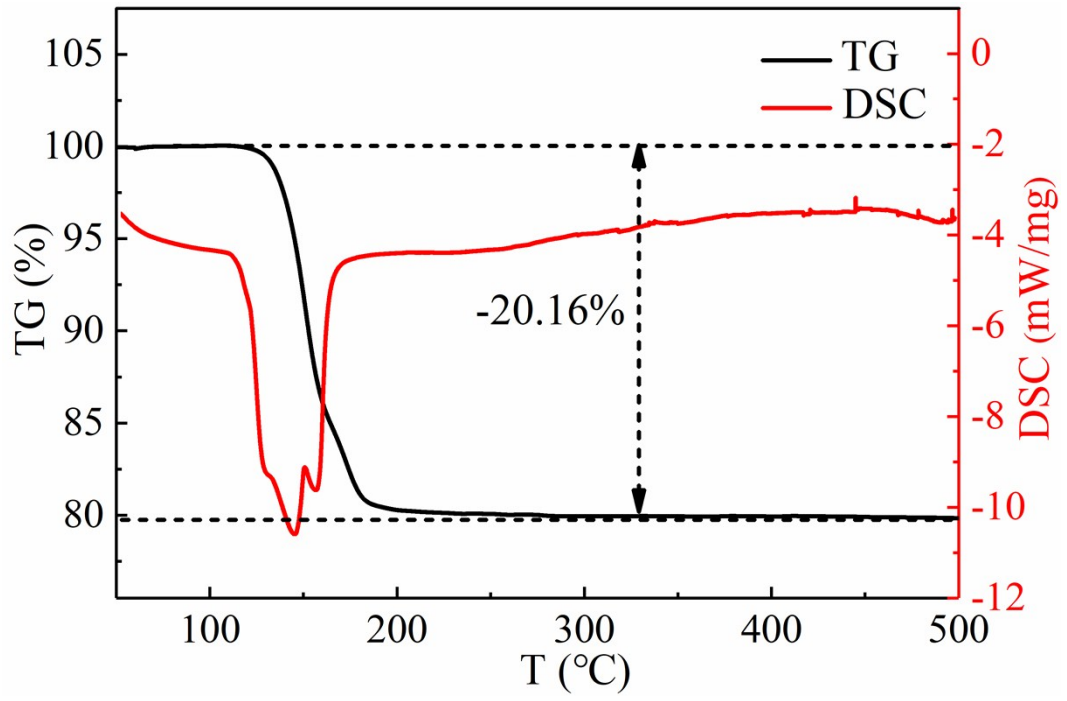

**Fig.S2** TG-DSC analysis of H<sub>2</sub>SO<sub>4</sub>-treated I-PG

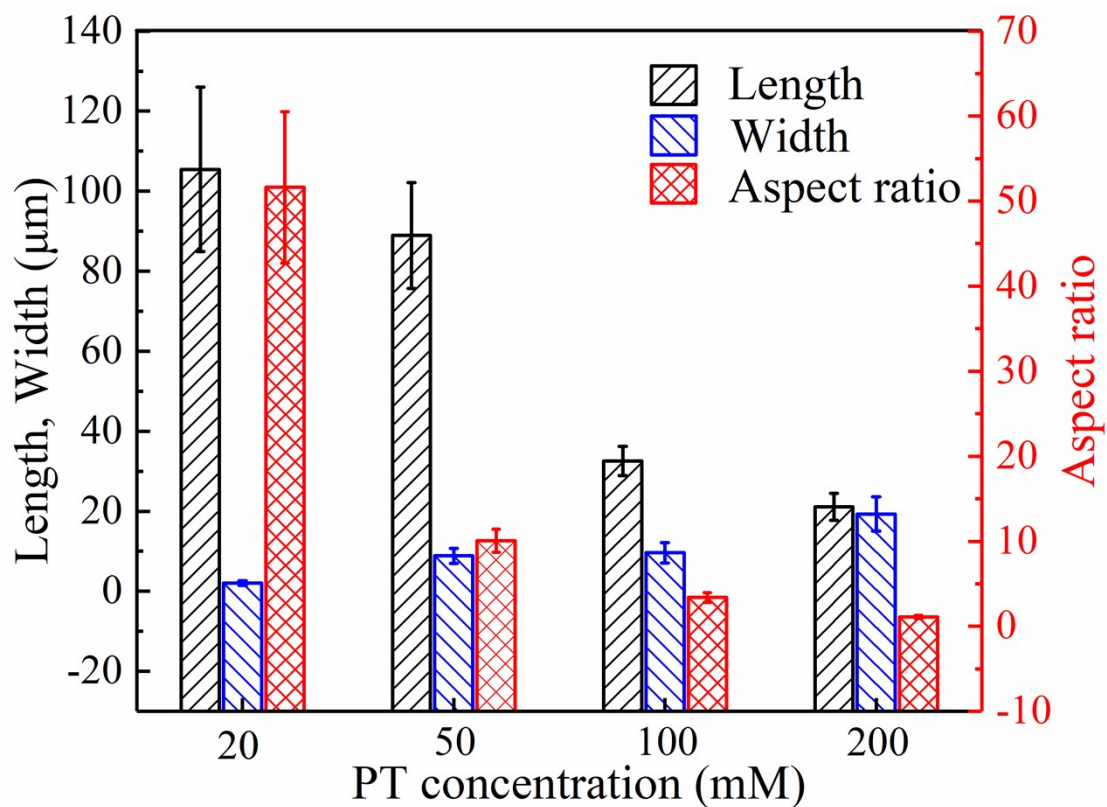

**Fig.S3** Average lengths, widths and aspect ratios of the  $\alpha$ -CaSO<sub>4</sub>·0.5H<sub>2</sub>O crystals prepared at different PT concentrations solutions.

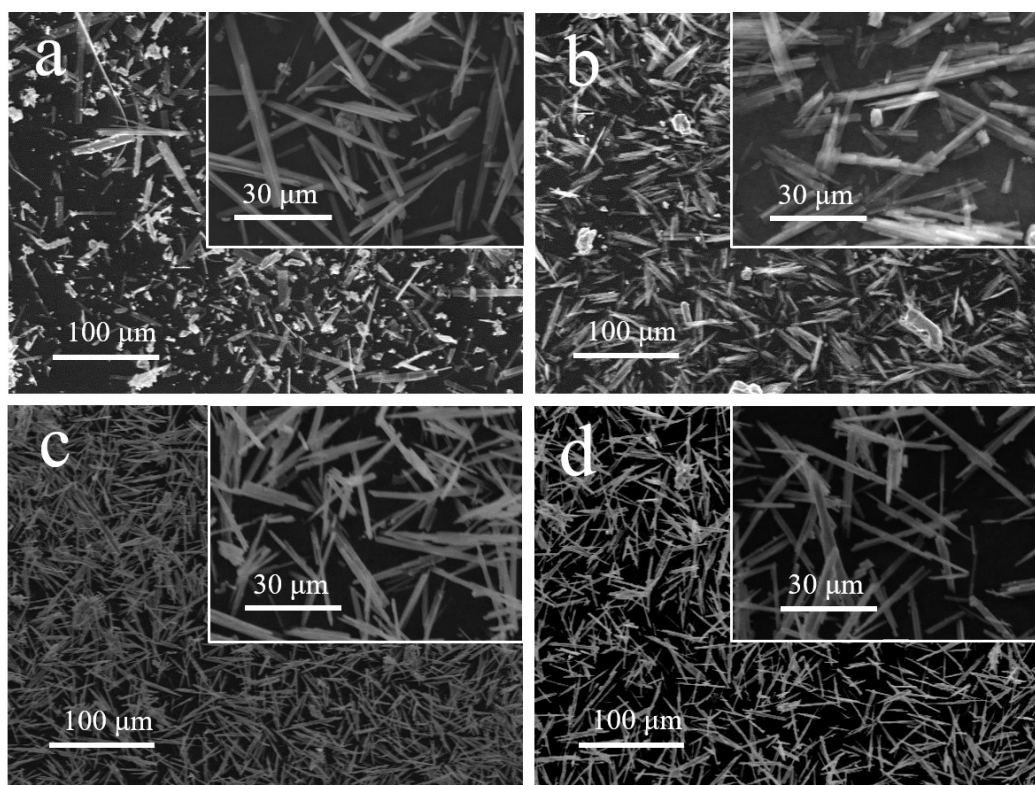

**Fig. S4** SEM images of obtained crystals using different concentrations of NaCl: (a) 20 mM, (b) 50 mM, (c) 100 mM and (d) 200 mM.

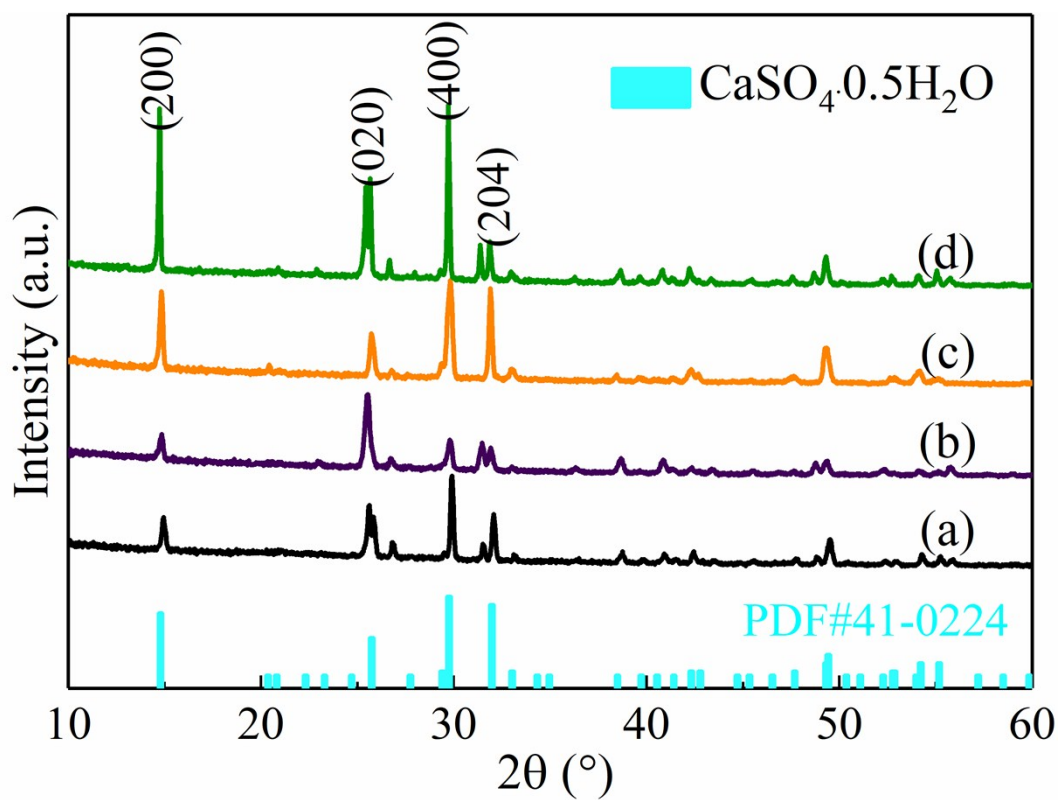

**Fig.S5** XRD patterns of the obtained crystals assisted by different concentration NaCl:

(a) 20 mM, (b) 50 mM, (c) 100 mM and (d) 200 mM.

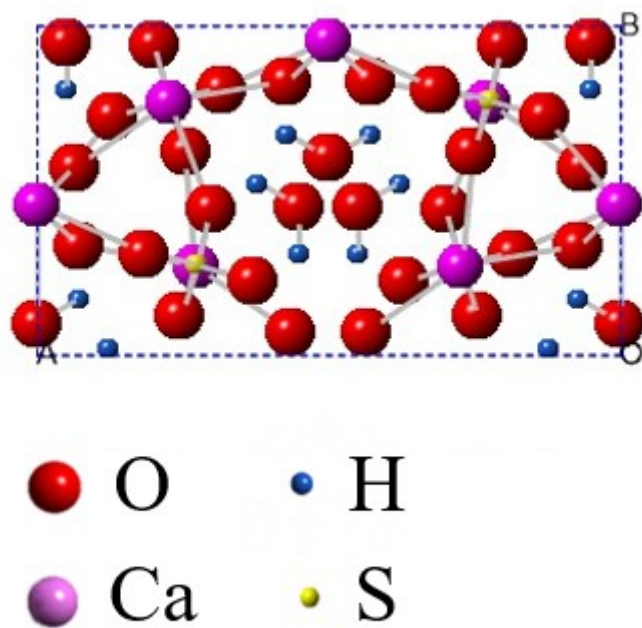

**Fig.S6** Chains structure of  $\alpha$ -CaSO<sub>4</sub>·0.5H<sub>2</sub>O crystals view along *c*-axis



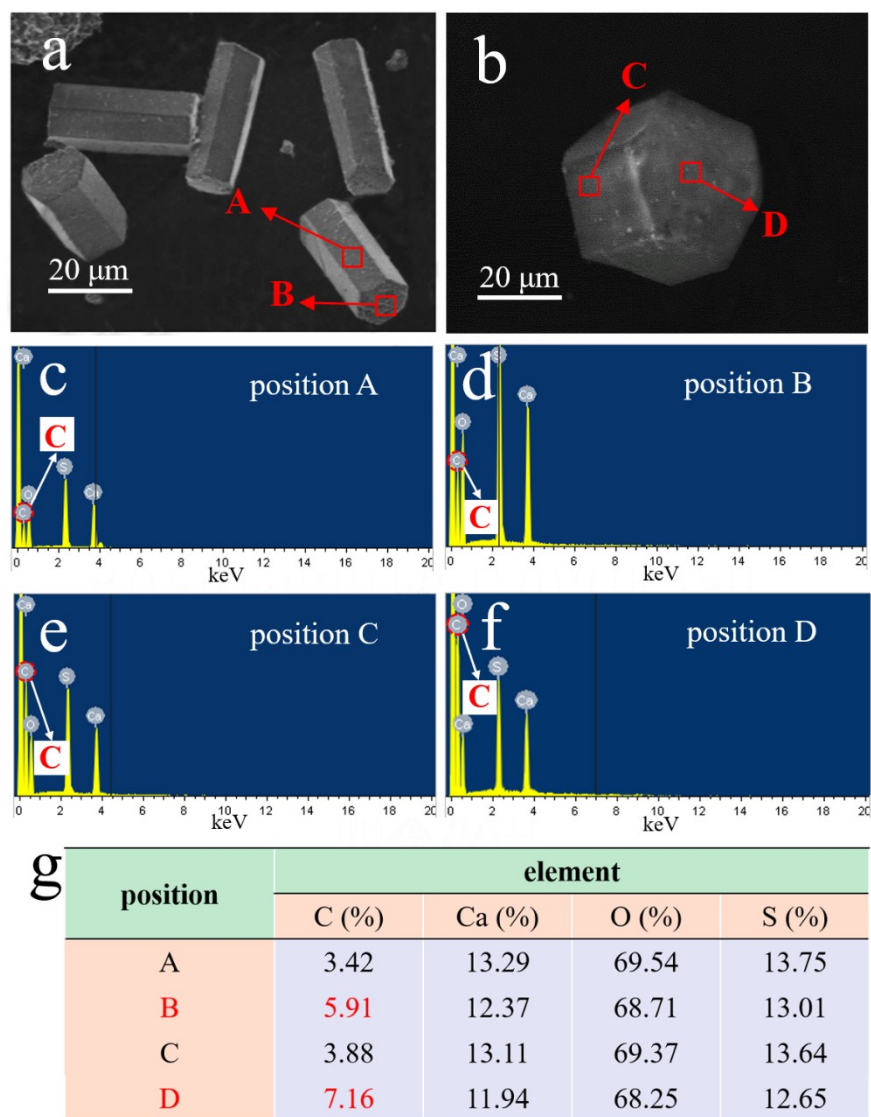

**Fig.S7** (a, b) SEM images of the rod-shaped  $\alpha$ -CaSO<sub>4</sub>·0.5H<sub>2</sub>O crystals that prepared in 100 mM and 200 mM PT aqueous solution, respectively, which have been displayed in **Fig.4d** and **e**; (c-f) Corresponding EDS analysis of samples: (c) position A, (d) position B, (e) position C, (f) position D; (g) Elemental contents of the above four positions from EDS analysis.

**Fig.S7a** and **b** are **Fig. 4d** and **e** which were shown in the main paper respectively.
